# Supplementary material for: Comparative study of alterations in phospholipid profiles upon liver cancer in humans and mice
Source: Royal Society of Chemistry journal article supplement (doi:10.1039/d0an01080d), 2020-01-01
Supplement: d0an01080d1.pdf [file d0an01080d1.pdf]

*Electronic Supplementary Information for*

# Comparative Study of Alterations in Phospholipid Profiles upon Liver Cancer in Humans and Mice

Haiyan Lu<sup>a</sup>, Hua Zhang<sup>a</sup>, Yipo Xiao<sup>b</sup>, Konstantin Chingina<sup>b</sup>, Chao Dai<sup>c,d</sup>, Feng Wei<sup>e</sup>, Nanya Wang<sup>f</sup>,  
Vladimir Frankevich<sup>g</sup>, Vitaly Chagovets<sup>g</sup>, Fan Zhou<sup>c\*</sup>, and Huanwen Chen<sup>b\*</sup>

<sup>a</sup>State Key Laboratory of Inorganic Synthesis and Preparative Chemistry, College of Chemistry, Jilin University, Changchun 130012, P. R. China

<sup>b</sup>Jiangxi Key Laboratory for Mass Spectrometry and Instrumentation, East China University of Technology, Nanchang 330013, P. R. China

<sup>c</sup>Department of Hepatobiliary and Pancreatic Surgery, the Second Affiliated Hospital of Nanchang University, Nanchang 330006, P. R. China

<sup>d</sup>Department of Hepatobiliary and Pancreatic Surgery, Jiu Jiang NO.1 People's Hospital, Jiujiang 332000, China

<sup>e</sup>Department of Hepatobiliary and Pancreatic Surgery, The First Hospital of Jilin University, 130021, P. R. China

<sup>f</sup>The Cancer Center, The First Hospital of Jilin University, 130021, P. R. China

<sup>g</sup>National Medical Research Center for Obstetrics, Gynecology and Perinatology named after Academician V.I. Kulakov of Ministry of Healthcare of Russian Federation, Moscow, 117997 Russian Federation

**Corresponding author:** Prof. Dr. Fan Zhou, **Email:** [nczhoufan@hotmail.com](mailto:nczhoufan@hotmail.com)

Prof. Dr. Huanwen Chen, **Email:** [chw8868@gmail.com](mailto:chw8868@gmail.com)

## **Serum Preparation**

Blood samples were collected after overnight fasting of the subjects. The collected blood samples were centrifuged at 3000 rpm for 10 min at 4 °C (Allegra 64R Centrifuge, Beckman Coulter) for obtaining serum samples. For DI-ESI-MS analysis, serum sample preparation referred to the earlier literature.<sup>1</sup> As a first step, 100µl of thawed serum sample under 4 °C was added into a labeled 1.5 ml Eppendorf vial. Next, protein precipitation and phospholipids extraction were performed by adding 300 µl methanol, the mixture was vortexed for 15 s and stored at -20 °C for 20 min. Then, each sample was centrifuged at 12000 rpm for 10 min at 4 °C, and 200 µl supernatant was collected into labeled 1.5 ml Eppendorf vial for DI-ESI-MS analysis.

## **Analysis of Serum by DI-ESI-MS**

For DI-ESI-MS analysis, all samples were diluted 200 times using methanol to avoid the contaminants to instrument. The DI-ESI-MS experiments were carried out using an Orbitrap Fusion Tribrid mass spectrometer (Thermo Scientific, San Jose, CA, United States). Mass spectra were collected in the mass range of  $m/z$  400-1100. The positive ESI-MS spray voltage was 3.5 kV. The sheath gas pressure was 20 instrument units. The ion transfer tube temperature and vaporizer temperature were kept at 320 °C and 25 °C, respectively. Each sample was analyzed in eight replicates.

1. D. Wang, S. L. Cheng, Q. Fei, H. Gu, D. Raftery, B. Cao, X. Sun, J. Yan, C. Zhang and J. Wang, *Psychiat. Res.*, 2019, **272**, 18-29.

**Table S1. Chemical assignment for signals from tissue and serum samples.**

| No. | Compounds | Molecular formula                                               | Accurate m/z | Theoretical m/z | Error(ppm) | Ion formation         | MS/MS fragments |
|-----|-----------|-----------------------------------------------------------------|--------------|-----------------|------------|-----------------------|-----------------|
| 1   | SM(34:1)  | C <sub>39</sub> H <sub>79</sub> N <sub>2</sub> O <sub>6</sub> P | 725.5586     | 725.5568        | 2          | [M + Na] <sup>+</sup> | 666/542         |
| 2   | SM(34:1)  | C <sub>39</sub> H <sub>79</sub> N <sub>2</sub> O <sub>6</sub> P | 741.5287     | 741.5307        | 3          | [M + K] <sup>+</sup>  | 682/558         |
| 3   | PC(32:0)  | C <sub>40</sub> H <sub>80</sub> NO <sub>8</sub> P               | 756.5535     | 756.5514        | 3          | [M + Na] <sup>+</sup> | 698/574         |
| 4   | PC(32:0)  | C <sub>40</sub> H <sub>80</sub> NO <sub>8</sub> P               | 772.5231     | 772.5253        | 3          | [M + K] <sup>+</sup>  | 714             |
| 5   | PC(34:2)  | C <sub>42</sub> H <sub>80</sub> NO <sub>8</sub> P               | 758.5710     | 758.5694        | 2          | [M + H] <sup>+</sup>  | 699/575         |
| 6   | PC(34:2)  | C <sub>42</sub> H <sub>80</sub> NO <sub>8</sub> P               | 780.5545     | 780.5514        | 4          | [M + Na] <sup>+</sup> | 721/597         |
| 7   | PC(34:2)  | C <sub>42</sub> H <sub>80</sub> NO <sub>8</sub> P               | 796.5268     | 796.5253        | 2          | [M + K] <sup>+</sup>  | 737/614         |
| 8   | PC(36:4)  | C <sub>44</sub> H <sub>81</sub> NO <sub>8</sub> P               | 782.5711     | 782.5694        | 2          | [M + H] <sup>+</sup>  | 723/599         |
| 9   | PC(36:4)  | C <sub>44</sub> H <sub>81</sub> NO <sub>8</sub> P               | 804.5534     | 804.5538        | 0          | [M + Na] <sup>+</sup> | 745/621         |
| 10  | PC(36:4)  | C <sub>44</sub> H <sub>81</sub> NO <sub>8</sub> P               | 820.5225     | 820.5253        | 3          | [M + K] <sup>+</sup>  | 761/637         |
| 11  | PC(34:1)  | C <sub>42</sub> H <sub>82</sub> NO <sub>8</sub> P               | 798.5387     | 798.5410        | 3          | [M + K] <sup>+</sup>  | 740/616         |
| 12  | PC(36:2)  | C <sub>44</sub> H <sub>84</sub> NO <sub>8</sub> P               | 786.6038     | 786.6007        | 4          | [M + H] <sup>+</sup>  | 727/645         |
| 13  | PC(36:2)  | C <sub>44</sub> H <sub>84</sub> NO <sub>8</sub> P               | 808.5802     | 808.5827        | 3          | [M + Na] <sup>+</sup> | 750/626         |
| 14  | PC(36:2)  | C <sub>44</sub> H <sub>84</sub> NO <sub>8</sub> P               | 824.5540     | 824.5566        | 3          | [M + K] <sup>+</sup>  | 766/642         |
| 15  | PC(38:4)  | C <sub>46</sub> H <sub>84</sub> NO <sub>8</sub> P               | 810.6018     | 810.6007        | 1          | [M + H] <sup>+</sup>  | 752/628         |
| 16  | PC(38:4)  | C <sub>46</sub> H <sub>84</sub> NO <sub>8</sub> P               | 832.5799     | 832.5827        | 3          | [M + Na] <sup>+</sup> | 774/650         |
| 17  | PC(38:4)  | C <sub>46</sub> H <sub>84</sub> NO <sub>8</sub> P               | 848.5539     | 848.5566        | 3          | [M + K] <sup>+</sup>  | 790/666         |
| 18  | PA(37:6)  | C <sub>40</sub> H <sub>67</sub> NO <sub>8</sub> P               | 745.4206     | 745.4205        | 0          | [M + K] <sup>+</sup>  | 713/621         |
| 19  | PC(40:9)  | C <sub>48</sub> H <sub>78</sub> NO <sub>8</sub> P               | 828.5534     | 828.5538        | 0          | [M + H] <sup>+</sup>  | 769/645         |
| 20  | PC(38:6)  | C <sub>46</sub> H <sub>80</sub> NO <sub>8</sub> P               | 806.5689     | 806.5694        | 1          | [M + H] <sup>+</sup>  | 747/624         |
| 21  | PC(42:9)  | C <sub>50</sub> H <sub>82</sub> NO <sub>8</sub> P               | 856.5853     | 856.5851        | 1          | [M + H] <sup>+</sup>  | 798/674         |

**Table S2. The list of signals (VIP > 1.0) that made major contributions to differentiate different sample groups.**

| Human tissue |           |            |           | Mouse tissue |           |            |           | Human serum |           |            |           |
|--------------|-----------|------------|-----------|--------------|-----------|------------|-----------|-------------|-----------|------------|-----------|
| <i>m/z</i>   | VIP value | <i>m/z</i> | VIP value | <i>m/z</i>   | VIP value | <i>m/z</i> | VIP value | <i>m/z</i>  | VIP value | <i>m/z</i> | VIP value |
| 733          | 2.3794    | 833        | 1.28675   | 773          | 3.62778   | 851        | 1.30406   | 805         | 2.76751   | 775        | 1.3645    |
| 759          | 1.88311   | 807        | 1.28437   | 845          | 3.07593   | 801        | 1.28012   | 833         | 2.65499   | 810        | 1.35514   |
| 823          | 1.86643   | 897        | 1.28202   | 774          | 2.60883   | 810        | 1.23421   | 807         | 2.50083   | 816        | 1.35162   |
| 882          | 1.85497   | 877        | 1.27225   | 846          | 2.44295   | 807        | 1.23168   | 814         | 2.42166   | 733        | 1.34682   |
| 771          | 1.82263   | 741        | 1.26714   | 799          | 2.42491   | 787        | 1.21953   | 784         | 2.33634   | 785        | 1.34589   |
| 757          | 1.82185   | 878        | 1.2607    | 771          | 2.40165   | 833        | 1.20467   | 783         | 2.31688   | 734        | 1.3274    |
| 872          | 1.80231   | 805        | 1.23961   | 825          | 2.27269   | 781        | 1.19405   | 831         | 2.24655   | 709        | 1.32051   |
| 797          | 1.7968    | 900        | 1.23837   | 797          | 2.11489   | 742        | 1.19044   | 809         | 2.22894   | 722        | 1.2977    |
| 761          | 1.72105   | 826        | 1.23707   | 827          | 1.99163   | 829        | 1.18259   | 747         | 2.13921   | 882        | 1.23076   |
| 726          | 1.69883   | 735        | 1.22889   | 826          | 1.91464   | 783        | 1.17435   | 710         | 2.09982   | 859        | 1.19399   |
| 755          | 1.68951   | 799        | 1.21653   | 798          | 1.88638   | 811        | 1.16821   | 806         | 2.06853   | 822        | 1.19244   |
| 783          | 1.66545   | 796        | 1.20925   | 873          | 1.8632    | 808        | 1.11181   | 821         | 2.03602   | 712        | 1.18668   |
| 870          | 1.58203   | 819        | 1.19828   | 772          | 1.83337   | 782        | 1.10282   | 858         | 1.96763   | 857        | 1.17567   |
| 851          | 1.5727    | 817        | 1.17656   | 800          | 1.81875   | 735        | 1.08574   | 829         | 1.93484   | 708        | 1.17186   |
| 779          | 1.52028   | 881        | 1.16252   | 849          | 1.78788   | 760        | 1.04007   | 720         | 1.82965   | 750        | 1.16124   |
| 821          | 1.51691   | 834        | 1.16246   | 757          | 1.6345    | 857        | 1.03353   | 808         | 1.82368   | 726        | 1.08095   |
| 787          | 1.45016   | 760        | 1.16177   | 775          | 1.62493   | 746        | 1.029     | 759         | 1.79345   | 872        | 1.07786   |
| 849          | 1.44399   | 717        | 1.13954   | 823          | 1.60569   | 830        | 1.0212    | 834         | 1.76201   | 870        | 1.07453   |
| 781          | 1.4379    | 800        | 1.13728   | 847          | 1.56536   | 812        | 1.01108   | 776         | 1.63569   | 815        | 1.05913   |
| 856          | 1.43284   | 844        | 1.1153    | 822          | 1.51394   |            |           | 835         | 1.57841   | 855        | 1.01747   |
| 845          | 1.42794   | 852        | 1.11432   | 758          | 1.47691   |            |           | 778         | 1.57558   | 794        | 1.01003   |
| 795          | 1.42525   | 850        | 1.09766   | 874          | 1.46825   |            |           | 854         | 1.56323   | 767        | 1.01001   |
| 739          | 1.40891   | 859        | 1.08669   | 809          | 1.44878   |            |           | 844         | 1.46395   |            |           |
| 769          | 1.40422   | 811        | 1.08529   | 819          | 1.42884   |            |           | 898         | 1.44547   |            |           |
| 825          | 1.39791   | 767        | 1.06322   | 745          | 1.42782   |            |           | 866         | 1.42449   |            |           |
| 740          | 1.38374   | 824        | 1.03907   | 821          | 1.3873    |            |           | 706         | 1.41925   |            |           |
| 898          | 1.36148   | 831        | 1.03858   | 784          | 1.36864   |            |           | 766         | 1.40665   |            |           |
| 884          | 1.35164   | 773        | 1.03223   | 850          | 1.35245   |            |           | 832         | 1.38359   |            |           |
| 791          | 1.34623   | 734        | 1.02822   | 759          | 1.34902   |            |           | 895         | 1.38322   |            |           |
| 857          | 1.32709   | 883        | 1.02458   | 824          | 1.33866   |            |           | 830         | 1.37124   |            |           |
| 809          | 1.31355   | 756        | 1.01069   | 828          | 1.32343   |            |           | 838         | 1.3666    |            |           |

**Table S3. The list of the importance of signal features that are used to predict liver cancer in the random forest model.**

| <i>m/z</i> | significance |
|------------|--------------|------------|--------------|------------|--------------|------------|--------------|------------|--------------|
| 701        | 0.069768     | 741        | 0.286483     | 781        | 0.535175     | 821        | 0.230881     | 861        | 0.339997     |
| 702        | 0.591454     | 742        | 0.734353     | 782        | 0.367831     | 822        | 0.83992      | 862        | 0.211984     |
| 703        | 0.390325     | 743        | 1.299298     | 783        | 0.098858     | 823        | 1.763338     | 863        | 0.292297     |
| 704        | 1.149526     | 744        | 0.290318     | 784        | 0.130899     | 824        | 0.142469     | 864        | 0.177599     |
| 705        | 0.274289     | 745        | 0.553727     | 785        | 0.149389     | 825        | 0.370823     | 865        | 0.186992     |
| 706        | 2.638271     | 746        | 0.45099      | 786        | 0.315065     | 826        | 0.198789     | 866        | 2.078227     |
| 707        | 0.87653      | 747        | 0.408593     | 787        | 0.616762     | 827        | 0.242734     | 867        | 0.305469     |
| 708        | 0.785582     | 748        | 0.300302     | 788        | 0.5173       | 828        | 0.360736     | 868        | 0.20348      |
| 709        | 1.136774     | 749        | 0.32201      | 789        | 0.21924      | 829        | 0.321271     | 869        | 0.408671     |
| 710        | 0.548553     | 750        | 0.225379     | 790        | 0.076467     | 830        | 0.314364     | 870        | 2.146491     |
| 711        | 0.148665     | 751        | 0.240252     | 791        | 0.97885      | 831        | 0.228203     | 871        | 0.091805     |
| 712        | 0.511026     | 752        | 0.828356     | 792        | 0.753034     | 832        | 0.128711     | 872        | 0.323609     |
| 713        | 0.313514     | 753        | 0.279998     | 793        | 0.271983     | 833        | 0.177641     | 873        | 0.359209     |
| 714        | 0.1398       | 754        | 0.429618     | 794        | 0.276039     | 834        | 0.161003     | 874        | 0.190444     |
| 715        | 1.288191     | 755        | 0.288254     | 795        | 0.179643     | 835        | 0.247803     | 875        | 0.797682     |
| 716        | 0.141756     | 756        | 0.373611     | 796        | 0.21431      | 836        | 0.104223     | 876        | 0.35806      |
| 717        | 0.399322     | 757        | 0.242928     | 797        | 0.19931      | 837        | 0.59676      | 877        | 1.467637     |
| 718        | 0.211278     | 758        | 0.30848      | 798        | 0.228373     | 838        | 3.523515     | 878        | 0.33007      |
| 719        | 0.546985     | 759        | 0.485696     | 799        | 0.139049     | 839        | 0.203709     | 879        | 0.346099     |
| 720        | 0.789761     | 760        | 0.364871     | 800        | 0.739107     | 840        | 0.241764     | 880        | 0.825889     |
| 721        | 0.258434     | 761        | 0.233425     | 801        | 0.075952     | 841        | 0.369065     | 881        | 0.142615     |
| 722        | 2.105688     | 762        | 0.101748     | 802        | 0.466305     | 842        | 0.232641     | 882        | 1.879974     |
| 723        | 0.467576     | 763        | 1.414282     | 803        | 0.492929     | 843        | 0.261604     | 883        | 0.174729     |
| 724        | 0.611476     | 764        | 0.531795     | 804        | 0.296047     | 844        | 0.333512     | 884        | 0.294112     |
| 725        | 0.407433     | 765        | 0.97183      | 805        | 0.187451     | 845        | 0.760019     | 885        | 0.300167     |
| 726        | 0.458377     | 766        | 1.172727     | 806        | 0.224058     | 846        | 0.266788     | 886        | 0.447865     |
| 727        | 0.316076     | 767        | 0.153124     | 807        | 0.234171     | 847        | 0.200385     | 887        | 0.270292     |
| 728        | 0.34082      | 768        | 0.342868     | 808        | 0.26369      | 848        | 0.128724     | 888        | 0.394723     |
| 729        | 0.397322     | 769        | 0.241416     | 809        | 0.303223     | 849        | 0.33597      | 889        | 0.878944     |
| 730        | 0.144291     | 770        | 0.249807     | 810        | 0.204429     | 850        | 0.645138     | 890        | 0.212534     |
| 731        | 0.558819     | 771        | 0.121651     | 811        | 0.182058     | 851        | 1.07167      | 891        | 0.949184     |
| 732        | 0.549667     | 772        | 0.130608     | 812        | 0.1879       | 852        | 0.248842     | 892        | 0.202053     |
| 733        | 0.973644     | 773        | 0.439734     | 813        | 0.23259      | 853        | 0.111629     | 893        | 3.542242     |
| 734        | 6.518674     | 774        | 0.100179     | 814        | 0.611412     | 854        | 1.635022     | 894        | 1.22372      |
| 735        | 0.74386      | 775        | 0.696211     | 815        | 0.233168     | 855        | 0.335419     | 895        | 0.218404     |
| 736        | 0.170876     | 776        | 0.777451     | 816        | 0.267671     | 856        | 0.090813     | 896        | 0.551663     |
| 737        | 0.25067      | 777        | 0.684957     | 817        | 0.221142     | 857        | 0.612513     | 897        | 0.239048     |
| 738        | 0.143737     | 778        | 4.606335     | 818        | 0.224839     | 858        | 0.297996     | 898        | 4.652004     |
| 739        | 0.172284     | 779        | 0.173005     | 819        | 0.213009     | 859        | 0.234755     | 899        | 0.140153     |
| 740        | 0.229381     | 780        | 0.203082     | 820        | 0.080842     | 860        | 0.389737     | 900        | 0.396969     |
